# Supplementary material for: The Impact of the Pandemic on Mental Health in Ethnically Diverse Mothers: Findings from the Born in Bradford, Tower Hamlets and Newham COVID-19 Research Programmes
Source: MDPI journal article supplement (doi:10.3390/ijerph192114316), 2022-11-02
Supplement: s1 [file s1]

**Supplementary Table S1. Differences in maternal and home characteristics by levels of anxiety symptoms (N=2,807)**

| Characteristics                      | Anxiety Symptoms |                |      |               |          |               |        |               |       |
|--------------------------------------|------------------|----------------|------|---------------|----------|---------------|--------|---------------|-------|
|                                      | None             |                | Mild |               | Moderate |               | Severe |               | Total |
|                                      | N                | % (95% CI)     | N    | % (95% CI)    | N        | % (95% CI)    | N      | % (95% CI)    |       |
| Overall                              | 1360             | 48% (47%-50%)  | 861  | 31% (29%-32%) | 421      | 15% (14%-16%) | 165    | 6% (5%-7%)    | 2,807 |
| Ethnicity                            |                  |                |      |               |          |               |        |               |       |
| White                                |                  |                |      |               |          |               |        |               |       |
| British                              | 533              | 45% (42%-47%)  | 445  | 36% (33%-39%) | 172      | 14% (12%-16%) | 67     | 5% (4%-7%)    | 1,237 |
| Irish                                | 15               | 12% (8%-20%)   | 45   | 37% (29%-46%) | 59       | 49% (40%-58%) | <5     | ---           | 121   |
| Any other White                      | 87               | 40% (33%-46%)  | 69   | 32% (26%-38%) | 50       | 23% (18%-29%) | 13     | 6% (3%-10%)   | 219   |
| Black/Black British                  |                  |                |      |               |          |               |        |               |       |
| Caribbean                            | 21               | 46% (32%-60%)  | 15   | 33% (21%-47%) | 5        | 11% (5%-24%)  | 5      | 11% (5%- 24%) | 46    |
| African                              | 17               | 49% (33%-65%)  | 9    | 26% (14%-42%) | 6        | 17% (8%-33%)  | <5     | ---           | 35    |
| Asian/Asian British                  |                  |                |      |               |          |               |        |               |       |
| Indian                               | 61               | 65% (55%-74%)  | 21   | 22% (15%-32%) | 9        | 10% (5%-17%)  | <5     | ---           | 94    |
| Pakistani                            | 424              | 64% (61%-68%)  | 134  | 20% (17%-24%) | 69       | 10% (8%-13%)  | 32     | 5% (3%-7%)    | 659   |
| Bangladeshi                          | 81               | 41% (34%- 47%) | 67   | 34% (27%-40%) | 32       | 16% (12%-22%) | 20     | 10% (7%-15%)  | 200   |
| Any other Asian                      | 42               | 52% (41%-62%)  | 25   | 31% (22%-42%) | 9        | 11% (6%-20%)  | 5      | 6% (3%-14%)   | 81    |
| Any other ethnic group/Mixed         | 59               | 51% (42%-60%)  | 31   | 27% (20%-36%) | 10       | 9% (5%-15%)   | 15     | 13% (8%-21%)  | 115   |
| Relationship status                  |                  |                |      |               |          |               |        |               |       |
| Single                               | 159              | 48% (43%-54%)  | 74   | 23% (18%-27%) | 54       | 16% (13%-21%) | 41     | 13% (9%-17%)  | 328   |
| Married/civil partnership            | 1056             | 48% (46%-50%)  | 698  | 32% (30%-34%) | 337      | 15% (14%-17%) | 103    | 5% (4%-6%)    | 2,194 |
| Not married but in a relationship    | 145              | 51% (45%-57%)  | 89   | 31% (26%-37%) | 30       | 11% (7%-15%)  | 21     | 7% (5%-11%)   | 285   |
| Pregnancy status                     |                  |                |      |               |          |               |        |               |       |
| No                                   | 1244             | 49% (48%-51%)  | 775  | 31% (29%-33%) | 342      | 14% (12%-15%) | 154    | 6% (5%-7%)    | 2,515 |
| Yes                                  | 116              | 40% (34%-45%)  | 86   | 29% (25%-35%) | 79       | 27% (22%-32%) | 11     | 4% (2%-7%)    | 292   |
| Home condition – mould or damp house |                  |                |      |               |          |               |        |               |       |
| No                                   | 1079             | 51% (49%-53%)  | 656  | 31% (29%-33%) | 281      | 13% (12%-15%) | 98     | 5% (4%-6%)    | 2,114 |
| Yes                                  | 281              | 41% (37%-44%)  | 205  | 30% (26%-33%) | 140      | 20% (17%-23%) | 67     | 10% (8%-12%)  | 693   |

|                                                         |      |               |     |               |     |               |     |               |       |
|---------------------------------------------------------|------|---------------|-----|---------------|-----|---------------|-----|---------------|-------|
| <b>Worrying about job security</b>                      |      |               |     |               |     |               |     |               |       |
| Strongly disagree                                       | 233  | 61% (56%-66%) | 87  | 23% (19%-27%) | 42  | 11% (8%-15%)  | 21  | 5% (4%-8%)    | 383   |
| Disagree                                                | 371  | 54% (50%-57%) | 192 | 28% (25%-31%) | 103 | 15% (12%-18%) | 25  | 4% (2%-5%)    | 691   |
| Neither agree or disagree                               | 312  | 47% (44%-51%) | 184 | 28% (25%-31%) | 116 | 18% (15%-21%) | 47  | 7% (5%-9%)    | 659   |
| Agree                                                   | 327  | 44% (41%-48%) | 255 | 35% (31%-38%) | 116 | 16% (13%-19%) | 37  | 5% (4%-7%)    | 735   |
| Strongly agree                                          | 117  | 35% (30%-40%) | 143 | 42% (37%-48%) | 44  | 13% (10%-17%) | 35  | 10% (8%-14%)  | 339   |
| <b>Food insecurity – Food didn’t last</b>               |      |               |     |               |     |               |     |               |       |
| Never true                                              | 1172 | 57% (55%-59%) | 611 | 30% (28%-32%) | 200 | 10% (9%-11%)  | 78  | 4% (3%-5%)    | 2,061 |
| Sometimes true                                          | 155  | 30% (26-34%)  | 168 | 33% (29%-37%) | 132 | 26% (22%-30%) | 57  | 11% (9%-14%)  | 512   |
| Often true                                              | 33   | 14% (10%-19%) | 82  | 35% (29%-41%) | 89  | 38% (32%-44%) | 30  | 13% (9%-18%)  | 234   |
| <b>Food insecurity – Couldn’t afford balanced meals</b> |      |               |     |               |     |               |     |               |       |
| Never true                                              | 1171 | 57% (54%-59%) | 612 | 30% (28%-32%) | 209 | 10% (9%-11%)  | 80  | 4% (3%-5%)    | 2,072 |
| Sometimes true                                          | 141  | 30% (26%-34%) | 161 | 34% (30%-38%) | 127 | 27% (23%-31%) | 45  | 9% (7%-12%)   | 474   |
| Often true                                              | 48   | 18% (14%-24%) | 88  | 34% (28%-40%) | 85  | 33% (27%-38%) | 40  | 15% (11%-20%) | 261   |
| <b>Food insecurity – Have been hungry?</b>              |      |               |     |               |     |               |     |               |       |
| No                                                      | 1333 | 54% (52%-56%) | 736 | 30% (28%-32%) | 285 | 12% (10%-13%) | 113 | 5% (4%-5%)    | 2,467 |
| Yes                                                     | 27   | 8% (6%-11%)   | 125 | 37% (32%-42%) | 136 | 40% (35%-45%) | 52  | 15% (12%-20%) | 340   |
| <b>Financial insecurity – How are you getting on?</b>   |      |               |     |               |     |               |     |               |       |
| Living comfortably                                      | 393  | 66% (62%-70%) | 149 | 25% (22%-29%) | 47  | 8% (6%-10%)   | 8   | 1% (1%-3%)    | 597   |
| Doing alright                                           | 635  | 54% (51%-57%) | 324 | 28% (25%-30%) | 162 | 14% (12%-16%) | 51  | 4% (3%-6%)    | 1,172 |
| Just about getting by                                   | 265  | 36% (33%-40%) | 281 | 39% (35%-42%) | 140 | 19% (17%-22%) | 42  | 6% (4%-8%)    | 728   |
| Finding it quite difficult                              | 50   | 24% (18%-30%) | 75  | 35% (29%-42%) | 52  | 25% (19%-31%) | 35  | 17% (12%-22%) | 212   |
| Finding it very difficult                               | 17   | 17% (11%-26%) | 32  | 33% (24%-43%) | 20  | 20% (14%-30%) | 29  | 30% (21%-39%) | 98    |
| <b>Quality of relationship with partner</b>             |      |               |     |               |     |               |     |               |       |
| NA- Single                                              | 159  | 48% (43%-54%) | 74  | 23% (18%-27%) | 54  | 16% (13%-21%) | 41  | 13% (9%-17%)  | 328   |
| Excellent                                               | 636  | 63% (60%-66%) | 258 | 26% (23%-29%) | 76  | 8% (6%-9%)    | 32  | 3% (2%-4%)    | 1,002 |
| Good                                                    | 475  | 45% (42%-48%) | 373 | 35% (33%-38%) | 161 | 15% (13%-18%) | 42  | 4% (3%-5%)    | 1,051 |
| Average                                                 | 79   | 23% (19%-27%) | 134 | 39% (34%-44%) | 108 | 31% (26%-36%) | 27  | 8% (5%-11%)   | 348   |
| Poor                                                    | 8    | 16% (8%-29%)  | 16  | 32% (21%-46%) | 15  | 30% (19%-44%) | 11  | 22% (13%-36%) | 50    |
| Very poor                                               | <5   | ---           | 6   | 21% (10%-40%) | 7   | 25% (12%-44%) | 12  | 43% (26%-61%) | 28    |
| <b>Social support – No. of people you can count on</b>  |      |               |     |               |     |               |     |               |       |
| 0-2: Low                                                | 229  | 34% (30%-37%) | 245 | 36% (32%-40%) | 141 | 21% (18%-24%) | 68  | 10% (8%-12%)  | 683   |
| 3-6: Medium                                             | 644  | 46% (44%-49%) | 460 | 33% (31%-35%) | 226 | 16% (14%-18%) | 67  | 5% (4%-6%)    | 1,397 |
| 7 and more: High                                        | 487  | 67% (63%-70%) | 156 | 21% (19%-25%) | 54  | 7% (6%-10%)   | 30  | 4% (3%-6%)    | 727   |

| <b>Social support – No. of people you can count on living locally</b> |     |               |     |               |     |               |     |               |       |
|-----------------------------------------------------------------------|-----|---------------|-----|---------------|-----|---------------|-----|---------------|-------|
| 0-2: Low                                                              | 552 | 40% (37%-42%) | 513 | 37% (35%-40%) | 218 | 16% (14%-18%) | 103 | 7% (6%-9%)    | 1,386 |
| 3-6: Medium                                                           | 568 | 53% (50%-56%) | 282 | 26% (24%-29%) | 174 | 16% (14%-19%) | 45  | 4% (3%-6%)    | 1,069 |
| 7 and more: High                                                      | 240 | 68% (63%-73%) | 66  | 19% (15%-23%) | 29  | 8% (6%-12%)   | 17  | 5% (3%-8%)    | 352   |
| <b>Loneliness</b>                                                     |     |               |     |               |     |               |     |               |       |
| None/almost none of the time                                          | 941 | 72% (69%-74%) | 271 | 21% (19%-23%) | 76  | 6% (5%-7%)    | 25  | 2% (1%-3%)    | 1,313 |
|                                                                       | 373 | 37% (35%-41%) | 398 | 40% (37%-43%) | 174 | 17% (15%-20%) | 50  | 5% (4%-7%)    | 995   |
| Some of the time                                                      | 39  | 10% (8%-14%)  | 165 | 43% (38%-48%) | 127 | 33% (29%-38%) | 53  | 14% (11%-18%) | 384   |
| Most of the time                                                      | 7   | 6% (3%-12%)   | 27  | 23% (17%-32%) | 44  | 38% (30%-47%) | 37  | 32% (24%-41%) | 115   |
| All/almost all of the time                                            |     |               |     |               |     |               |     |               |       |

**Supplementary Table S2. Predictive probabilities (as percentages) and the corresponding 95% CIs of clinically important depressive by ethnicity for the effect of financial insecurity during the pandemic (n=2,807)**

| <b>Model (a): Ethnicity only</b>                                                                                            | <b>Est.</b> | <b>95% CI: Low</b> | <b>95% CI: High</b> |
|-----------------------------------------------------------------------------------------------------------------------------|-------------|--------------------|---------------------|
| White: British                                                                                                              | 27.3%       | 24.8%              | 29.8%               |
| White: Other                                                                                                                | 49.7%       | 44.4%              | 55.0%               |
| Black: Caribbean/African                                                                                                    | 29.6%       | 19.7%              | 39.6%               |
| Asian: Indian                                                                                                               | 13.8%       | 6.9%               | 20.8%               |
| Asian: Pakistani                                                                                                            | 17.8%       | 14.8%              | 20.7%               |
| Asian: Bangladeshi                                                                                                          | 34.5%       | 27.9%              | 41.1%               |
| Other                                                                                                                       | 24.0%       | 18.0%              | 30.0%               |
| <b>Model (b): Ethnicity adjusted for financial insecurity only</b>                                                          |             |                    |                     |
| White: British                                                                                                              | 28.8%       | 26.2%              | 31.3%               |
| White: Other                                                                                                                | 47.7%       | 42.5%              | 52.9%               |
| Black: Caribbean/African                                                                                                    | 27.0%       | 17.8%              | 36.2%               |
| Asian: Indian                                                                                                               | 15.3%       | 7.8%               | 22.7%               |
| Asian: Pakistani                                                                                                            | 17.7%       | 14.8%              | 20.5%               |
| Asian: Bangladeshi                                                                                                          | 29.5%       | 23.5%              | 35.5%               |
| Other                                                                                                                       | 23.5%       | 17.7%              | 29.3%               |
| <b>Model (c): Ethnicity adjusted for location of residency &amp; ethnicity*financial insecurity interaction</b>             |             |                    |                     |
| White: British                                                                                                              | 27.8%       | 25.3%              | 30.2%               |
| White: Other                                                                                                                | 39.0%       | 33.9%              | 44.0%               |
| Black: Caribbean/African                                                                                                    | 25.5%       | 16.6%              | 34.4%               |
| Asian: Indian                                                                                                               | 14.3%       | 7.0%               | 21.5%               |
| Asian: Pakistani                                                                                                            | 25.1%       | 21.1%              | 29.0%               |
| Asian: Bangladeshi                                                                                                          | 24.0%       | 18.3%              | 29.7%               |
| Other                                                                                                                       | 20.6%       | 15.5%              | 25.6%               |
| <b>Model (d): Ethnicity adjusted for location, ethnicity*financial insecurity interaction, and ethnicity*Social support</b> |             |                    |                     |
| White: British                                                                                                              | 28.0%       | 25.4%              | 30.3%               |
| White: Other                                                                                                                | 36.3%       | 31.7%              | 40.9%               |
| Black: Caribbean/African                                                                                                    | 24.1%       | 15.0%              | 33.2%               |
| Asian: Indian                                                                                                               | 13.4%       | 6.6%               | 20.3%               |
| Asian: Pakistani                                                                                                            | 24.0%       | 20.2%              | 27.9%               |
| Asian: Bangladeshi                                                                                                          | 25.3%       | 19.4%              | 31.1%               |
| Other                                                                                                                       | 20.8%       | 15.7%              | 26.0%               |

Abbreviations: CI, confidence interval; Est, estimate

**Supplementary Table S3. Predictive probabilities (as percentages) and the corresponding 95% CIs of clinically important depressive by ethnicity for the effect of loneliness during the pandemic (n=2,807)**

| <b>Model (a): Ethnicity adjusted for loneliness only</b>                                                          | <b>Est.</b> | <b>95% CI: Low</b> | <b>95% CI: High</b> |
|-------------------------------------------------------------------------------------------------------------------|-------------|--------------------|---------------------|
| White: British                                                                                                    | 26.6%       | 24.4%              | 28.8%               |
| White: Other                                                                                                      | 36.8%       | 32.3%              | 41.4%               |
| Black: Caribbean/African                                                                                          | 30.2%       | 21.0%              | 39.4%               |
| Asian: Indian                                                                                                     | 18.6%       | 10.6%              | 26.6%               |
| Asian: Pakistani                                                                                                  | 23.6%       | 20.4%              | 26.9%               |
| Asian: Bangladeshi                                                                                                | 32.1%       | 26.5%              | 37.8%               |
| Other                                                                                                             | 26.2%       | 20.6%              | 31.8%               |
| <b>Model (b): Ethnicity adjusted for location &amp; ethnicity*loneliness interaction</b>                          |             |                    |                     |
| White: British                                                                                                    | 26.6%       | 24.3%              | 28.8%               |
| White: Other                                                                                                      | 30.8%       | 26.8%              | 34.7%               |
| Black: Caribbean/African                                                                                          | 31.6%       | 22.0%              | 41.2%               |
| Asian: Indian                                                                                                     | 19.2%       | 10.5%              | 27.9%               |
| Asian: Pakistani                                                                                                  | 29.1%       | 25.5%              | 32.6%               |
| Asian: Bangladeshi                                                                                                | 28.9%       | 23.9%              | 34.0%               |
| Black/ Mixed/ Other                                                                                               | 25.4%       | 22.0%              | 31.2%               |
| <b>Model (c): Ethnicity adjusted for location, ethnicity*loneliness interaction, and ethnicity*Social support</b> |             |                    |                     |
| White: British                                                                                                    | 27.2%       | 24.9%              | 29.4%               |
| White: Other                                                                                                      | 29.6%       | 25.7%              | 33.6%               |
| Black: Caribbean/African                                                                                          | 30.6%       | 20.5%              | 40.8%               |
| Asian: Indian                                                                                                     | 17.2%       | 9.1%               | 25.4%               |
| Asian: Pakistani                                                                                                  | 28.1%       | 24.5%              | 31.7%               |
| Asian: Bangladeshi                                                                                                | 29.7%       | 24.6%              | 34.8%               |
| Other                                                                                                             | 25.5%       | 20.1%              | 30.9%               |

Abbreviations: CI, confidence interval; Est, estimate

**Supplementary Table S4. Associations between ethnicity and clinically important anxiety symptoms (n=2,807)**

|                              | Univariate             | Multivariate                            |                              |                                  |                                        |
|------------------------------|------------------------|-----------------------------------------|------------------------------|----------------------------------|----------------------------------------|
|                              | Unadjusted             | Adjusted for location of residency only | Adjusted for loneliness only | Adjusted for social support only | Adjusted for financial insecurity only |
|                              | OR (95% CI)            | OR (95% CI)                             | OR (95% CI)                  | OR (95% CI)                      | OR (95% CI)                            |
| <b>Ethnicity</b>             |                        |                                         |                              |                                  |                                        |
| White other                  | 2.40<br>(1.84-3.11)    | 1.82<br>(1.39-2.39)                     | 1.63<br>(1.22-2.17)          | 2.08<br>(1.60-2.72)              | 2.14<br>(1.64-2.80)                    |
| Black: Caribbean/African     | 1.28<br>(0.75-2.18)    | 1.25<br>(0.73-2.15)                     | 1.42<br>(0.78-2.56)          | 1.15<br>(0.67-1.98)              | 1.06<br>(0.62-1.83)                    |
| Asian: Indian                | 0.61<br>(0.33-1.14)    | 0.63<br>(0.34-1.18)                     | 0.86<br>(0.44-1.67)          | 0.62<br>(0.33-1.16)              | 0.63<br>(0.33-1.18)                    |
| Asian: Pakistani             | 0.75<br>(0.58-0.97)    | 1.16<br>(0.87-1.54)                     | 1.12<br>(0.85-1.47)          | 0.78<br>(0.60-1.01)              | 0.69<br>(0.54-0.90)                    |
| Asian: Bangladeshi           | 1.47<br>(1.04-2.07)    | 1.16<br>(0.81-1.65)                     | 1.45<br>(1.00-2.12)          | 1.41<br>(0.99-2.01)              | 1.11<br>(0.78-1.56)                    |
| Other ethnicities            | 1.04<br>(0.71-1.51)    | 0.92<br>(0.63-1.35)                     | 1.24<br>(0.83-1.86)          | 0.98<br>(0.67-1.44)              | 0.94<br>(0.64-1.39)                    |
| White British                | 1.00                   | 1.00                                    | 1.00                         | 1.00                             | 1.00                                   |
| <b>Location of residency</b> |                        |                                         |                              |                                  |                                        |
| London                       | 2.53<br>(2.09-3.06)    | 2.34<br>(1.86-2.96)                     |                              |                                  |                                        |
| Bradford                     | 1.00                   | 1.00                                    |                              |                                  |                                        |
| <b>Loneliness</b>            |                        |                                         |                              |                                  |                                        |
| Some of the time             | 3.49<br>(2.71-4.48)    |                                         | 3.37<br>(2.61-4.36)          |                                  |                                        |
| All of the time              | 13.16<br>(10.06-17.21) |                                         | 12.29<br>(9.31-16.22)        |                                  |                                        |
| None of the time             | 1.00                   |                                         | 1.00                         |                                  |                                        |
| <b>Social Support</b>        |                        |                                         |                              |                                  |                                        |
| Medium (3-6)                 | 2.03<br>(1.56-2.64)    |                                         |                              | 1.88<br>(1.44-2.44)              |                                        |
| Low (0-2)                    | 3.37<br>(2.55-4.46)    |                                         |                              | 2.97<br>(2.23-3.94)              |                                        |
| High (+7)                    | 1.00                   |                                         |                              | 1.00                             |                                        |
| <b>Financial insecurity</b>  |                        |                                         |                              |                                  |                                        |
| Insecure                     | 2.47<br>(2.05-2.98)    |                                         |                              |                                  | 2.39<br>(1.98-2.89)                    |
| Secure                       | 1.00                   |                                         |                              |                                  | 1.00                                   |

Abbreviations: CI, confidence interval; OR, odds ratio

**Supplementary Table S5. Predictive probabilities (as percentages) and the corresponding 95% CIs of clinically important anxiety by ethnicity for the effect of financial insecurity during the pandemic (n=2,807)**

| <b>Model (a): Ethnicity only</b>                                                                                            | <b>Est.</b> | <b>95% CI: Low</b> | <b>95% CI: High</b> |
|-----------------------------------------------------------------------------------------------------------------------------|-------------|--------------------|---------------------|
| White: British                                                                                                              | 19.3%       | 17.1%              | 21.5%               |
| White: Other                                                                                                                | 36.5%       | 31.3%              | 41.6%               |
| Black: Caribbean/African                                                                                                    | 23.4%       | 14.2%              | 32.7%               |
| Asian: Indian                                                                                                               | 12.8%       | 6.0%               | 19.5%               |
| Asian: Pakistani                                                                                                            | 15.3%       | 12.6%              | 18.1%               |
| Asian: Bangladeshi                                                                                                          | 26.0%       | 19.9%              | 32.1%               |
| Other                                                                                                                       | 19.9%       | 14.3%              | 25.5%               |
| <b>Model (b): Ethnicity adjusted for financial insecurity only</b>                                                          |             |                    |                     |
| White: British                                                                                                              | 20.4%       | 18.1%              | 22.6%               |
| White: Other                                                                                                                | 34.7%       | 29.8%              | 39.7%               |
| Black: Caribbean/African                                                                                                    | 21.4%       | 12.9%              | 29.9%               |
| Asian: Indian                                                                                                               | 14.0%       | 6.8%               | 21.2%               |
| Asian: Pakistani                                                                                                            | 15.2%       | 12.5%              | 17.9%               |
| Asian: Bangladeshi                                                                                                          | 22.1%       | 16.7%              | 27.5%               |
| Other                                                                                                                       | 19.5%       | 14.1%              | 24.9%               |
| <b>Model (c): Ethnicity adjusted for location of residency &amp; ethnicity*financial insecurity</b>                         |             |                    |                     |
| White: British                                                                                                              | 19.9%       | 17.7%              | 22.1%               |
| White: Other                                                                                                                | 28.9%       | 24.2%              | 33.6%               |
| Black: Caribbean/African                                                                                                    | 22.6%       | 13.4%              | 31.8%               |
| Asian: Indian                                                                                                               | 14.0%       | 6.6%               | 21.3%               |
| Asian: Pakistani                                                                                                            | 20.5%       | 16.7%              | 24.3%               |
| Asian: Bangladeshi                                                                                                          | 18.1%       | 13.0%              | 23.2%               |
| Other                                                                                                                       | 17.4%       | 12.5%              | 22.3%               |
| <b>Model (d): Ethnicity adjusted for location, ethnicity*financial insecurity interaction, and ethnicity*Social support</b> |             |                    |                     |
| White: British                                                                                                              | 20.1%       | 17.8%              | 22.3%               |
| White: Other                                                                                                                | 27.3%       | 22.8%              | 31.7%               |
| Black: Caribbean/African                                                                                                    | 21.4%       | 11.9%              | 30.9%               |
| Asian: Indian                                                                                                               | 13.3%       | 6.3%               | 20.2%               |
| Asian: Pakistani                                                                                                            | 20.0%       | 16.2%              | 23.7%               |
| Asian: Bangladeshi                                                                                                          | 18.7%       | 13.4%              | 23.9%               |
| Other                                                                                                                       | 17.3%       | 12.5%              | 22.2%               |

Abbreviations: CI, confidence interval; Est, estimate

**Supplementary Table S6. Predictive probabilities (as percentages) and the corresponding 95% CIs of clinically important anxiety by ethnicity for the effect of loneliness during the pandemic (n=2,807)**

| <b>Model (a): Ethnicity adjusted for loneliness only</b>                                                         | <b>Est.</b> | <b>95% CI: Low</b> | <b>95% CI: High</b> |
|------------------------------------------------------------------------------------------------------------------|-------------|--------------------|---------------------|
| White: British                                                                                                   | 18.8%       | 16.8%              | 20.8%               |
| White: Other                                                                                                     | 25.9%       | 22.0%              | 29.9%               |
| Black: Caribbean/African                                                                                         | 23.7%       | 15.0%              | 32.4%               |
| Asian: Indian                                                                                                    | 16.9%       | 9.0%               | 24.8%               |
| Asian: Pakistani                                                                                                 | 20.0%       | 17.1%              | 23.5%               |
| Asian: Bangladeshi                                                                                               | 24.1%       | 18.9%              | 29.4%               |
| Black/ Mixed/ Other                                                                                              | 21.8%       | 16.3%              | 27.2%               |
| <b>Model (b): Ethnicity adjusted for location &amp; ethnicity*loneliness interaction</b>                         |             |                    |                     |
| White: British                                                                                                   | 18.8%       | 16.8%              | 20.9%               |
| White: Other                                                                                                     | 23.0%       | 19.2%              | 26.9%               |
| Black: Caribbean/African                                                                                         | 25.1%       | 16.2%              | 34.0%               |
| Asian: Indian                                                                                                    | 19.2%       | 11.1%              | 27.3%               |
| Asian: Pakistani                                                                                                 | 24.1%       | 20.4%              | 27.9%               |
| Asian: Bangladeshi                                                                                               | 22.5%       | 17.5%              | 27.5%               |
| Other                                                                                                            | 21.5%       | 16.3%              | 26.7%               |
| <b>Model (c): Ethnicity adjusted for location, ethnicity*loneliness interaction, and ethnicity*Socia support</b> |             |                    |                     |
| White: British                                                                                                   | 19.3%       | 17.2%              | 21.4%               |
| White: Other                                                                                                     | 22.4%       | 18.5%              | 26.3%               |
| Black: Caribbean/African                                                                                         | 25.5%       | 15.9%              | 35.1%               |
| Asian: Indian                                                                                                    | 17.8%       | 9.2%               | 26.4%               |
| Asian: Pakistani                                                                                                 | 23.5%       | 19.8%              | 27.3%               |
| Asian: Bangladeshi                                                                                               | 22.7%       | 17.6%              | 27.8%               |
| Other                                                                                                            | 20.9%       | 15.5%              | 26.3%               |

Abbreviations: CI, confidence interval; Est, estimate
